# Supplementary material for: Intermediate-paramagnetic phases with a half and a quarter spin entities in fluorinated biphenyl-3,5-diyl bis(tert-butyl nitroxides)
Source: Royal Society of Chemistry journal article supplement (doi:10.1039/c5tc00668f), 2015-01-01
Supplement: c5tc00668f2.pdf [file c5tc00668f2.pdf]

Supporting Information for

## Intermediate-paramagnetic phases with a half and a quarter spin entities in fluorinated biphenyl-3,5-diyl bis(*tert*-butyl nitroxides)

Takuya Konno, Hiroki Kudo, and Takayuki Ishida\*

*Department of Engineering Science, The University of Electro-Communications,  
Chofu, Tokyo 182-8585, Japan*

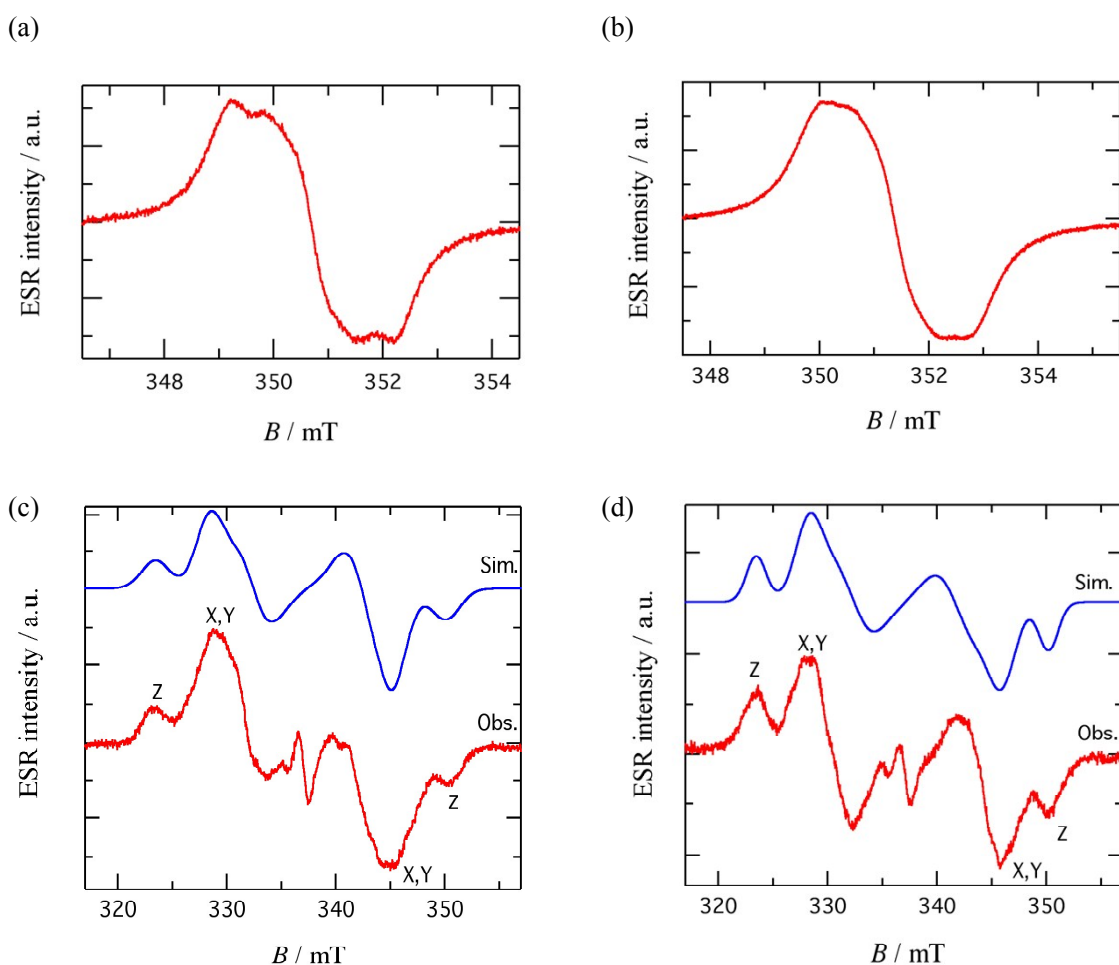

**Figure S1.** X-band EPR spectra of (a) 3FBPBN and (b) 25FBPBN, measured in a degassed diluted toluene solution (ca.  $1 \times 10^{-4}$  mol/L) at room temperature. Frozen-solution EPR of (c) 3FBPBN and (d) 25FBPBN, measured in a degassed diluted toluene solution at 145 K. The zero-field splitting parameters were determined from these fine structures, giving  $|D| = 1.25 \times 10^{-2} \text{ cm}^{-1}$  and  $|E| = 1.1 \times 10^{-3} \text{ cm}^{-1}$  for 3FBPBN and  $|D| = 1.25 \times 10^{-2} \text{ cm}^{-1}$  and  $|E| = 1.3 \times 10^{-3} \text{ cm}^{-1}$  for 25FBPBN. Forbidden signals were hardly observed. Note that the concentrations of doublet impurities are very low.

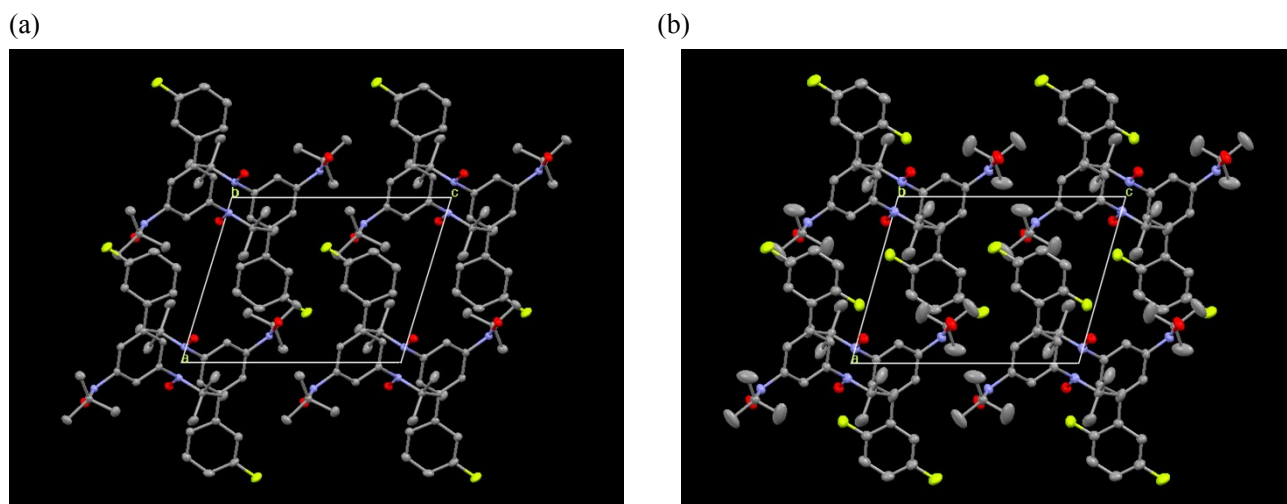

**Figure S2.** X-ray crystal structures of (a) 3FBPBN (163 K) and (b) the high-temperature phase of 25FBPBN (296 K), viewed along the  $b$  axis.

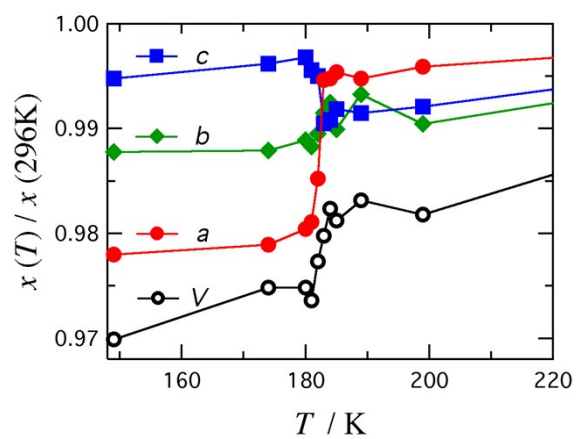

**Figure S3.** The cell parameters of 25FBPBN as a function of temperature.
